# Supplementary material for: Design of Bacterial Strain-Specific qPCR Assays Using NGS Data and Publicly Available Resources and Its Application to Track Biocontrol Strains
Source: PubMed Central journal article supplement (PMC7077341; doi:10.3389/fmicb.2020.00208), 2020-03-10
Supplement: Data_Sheet_2.pdf [file Data_Sheet_2.pdf]

Supplemental Table 1. Primers and probes obtained used with the proposed workflow after *in silico* design, testing for technical viability and strain specificity.

| mBCA  | Primer | Primer sequence         | Tm (°C) | Prod. len. (nt) | Probe sequence         | Probe Tm (°C) | Labels (5'/3') |
|-------|--------|-------------------------|---------|-----------------|------------------------|---------------|----------------|
| B24   | 2f     | ATGGGGTGGAAAGTCAAAGG    | 59.8    | 120             | TCTCAACCATTGCTTCCGGTCA | 57.3          | FAM/<br>BHQ1   |
|       | 2r     | GGTAGTGCCGTGGAGGAATA    | 60.0    |                 |                        |               |                |
|       | 5f     | GAGTGCCTCGGGTTGAGT      | 59.8    | 147             | TGAGCGTTACCGTGCCTCCG   | 65.0          | R610/<br>BHQ-2 |
|       | 5r     | CATAGTCGGGTGCCTAGC      | 60.8    |                 |                        |               |                |
|       | 4f     | CTACCCCTCGTATCGCTTCC    | 61.0    | 151             | ACCTGCGCGTGGATCCGAAG   | 63.5          | Cy5/<br>BBQ    |
|       | 4r     | ACGTCTCGCCTCTATCCTCA    | 60.0    |                 |                        |               |                |
| B25   | 473f   | GTCAATATCCCGGTGGTCTG    | 60.2    | 74              | AACCTGGCGGTGTTGCTGGG   | 63.5          | FAM/<br>BHQ1   |
|       | 473r   | AGCGACAGATAGCCACGTA     | 60.8    |                 |                        |               |                |
|       | 27f    | CACTGGGGGTGATAGGTACG    | 60.3    | 77              | ACCACCAACTGCCGGGTCGA   | 65.0          | R610/<br>BHQ-2 |
|       | 27r    | GGAAACGACGAGCGTGTAAT    | 60.1    |                 |                        |               |                |
|       | 24f    | CGCGTACTTCACGTCATAA     | 59.8    | 59              | CGGACCACGACGGGAGTCA    | 63.1          | Cy5/<br>BBQ    |
|       | 24r    | TGAAGGAGTACGAGGGATGG    | 60.1    |                 |                        |               |                |
| B410  | 220f   | GGAGGAAGTTCCGGTTCAAT    | 64.1    | 112             | GGCAACCGTGAAAAAGCCTGCC | 70.8          | FAM/<br>BHQ1   |
|       | 220r   | TCTGAGATCAGTGCCTCGAA    | 63.8    |                 |                        |               |                |
|       | 167f   | CATTGCTCCAACCTCTTGGT    | 64.0    | 101             | CACCTCCCAGAGGACCTGAACG | 67.6          | R610/<br>BHQ-2 |
|       | 167r   | CTACTGGCACAACCTGGAGCA   | 64.1    |                 |                        |               |                |
|       | 35f    | ATATTTAGCCCGCTTTGGT     | 63.3    | 102             | GGTCGATTCGCGGCTCCTGA   | 70.2          | Cy5/<br>BBQ    |
|       | 35r    | GACCTCTGCGAATGTTGTGA    | 64.0    |                 |                        |               |                |
| B2017 | 18f    | ATCCGTCCAAAGGCGTGAG     | 67.5    | 355             | ACGCGGCGCTGCAGGCAAAA   | 63.5          | FAM/<br>BHQ1   |
|       | 18r    | GACTCTCCTTGTATGTAGGCCAT | 62.2    |                 |                        |               |                |
|       | 20f    | GTTCCAGCACTGGAATGGA     | 67.4    | 833             | GGCTTGCCCGGATCGCAGT    | 65.5          | R610/          |

|       |      |                      |       |     |                       |      |       |
|-------|------|----------------------|-------|-----|-----------------------|------|-------|
|       | 20r  | TGGGACGATCCTTTTCCTGC | 68.4  | 865 | CGGCCGATCATGTGCCGCGG  | 67.5 | BHQ-2 |
|       | 17f  | TTGACCTTGGGCAGTTGGTT | 66.6  |     |                       |      | Cy5   |
|       | 17r  | GGCGCTTCGTCAACATCATC | 68.0  |     |                       |      | BBQ   |
| B2021 | 43f  | TTGTTCGGATCAGCGACTC  | 59.93 | 152 | TGCCTCGATTGCGAAAATGCA | 69.0 | FAM   |
|       | 43r  | GATGTCGCCACCTCGATAAT | 59.92 |     |                       |      | BHQ1  |
|       | 2f   | ATGGGGCTATCGTCGAGTC  | 60.1  | 150 | CGCGCCATATTGCGGGAAAA  | 60.0 | R610  |
|       | 2r   | AGGTTTCCGGAGGAAAGAAA | 60.1  |     |                       |      | BHQ-2 |
|       | 182f | CTCAAAAGCGGGGTCAGTTA | 60.24 | 134 | TTTGGCGTTGACACGGCTCG  | 69.8 | Cy5   |
|       | 182r | TGGTCATCATCACGGAATG  | 60.33 |     |                       |      | BBQ   |

BBQ650, BlackBerry® Quencher 650; BHQ-2, BlackHole® Quencher-2; mBCA, microbial biocontrol agent.

Supplemental Table 2. Strains used to test primer pair and probe specificity.

| Target | Off-target                | Species (by 16S sequencing)                           |
|--------|---------------------------|-------------------------------------------------------|
| B24    | B520                      | <i>Microbacterium foliorum</i>                        |
|        | B1144                     | <i>Microbacterium testaceum/foliorum/oxydans</i>      |
|        | B1150                     | <i>Microbacterium sp./profundi/shaanxiense</i>        |
|        | B1539                     | <i>Microbacterium sp./schleiferi</i>                  |
|        | B1780                     | <i>Microbacterium oxydans/maritypicum</i>             |
|        | B2014                     | <i>Microbacterium oxydans</i>                         |
|        | B2015                     | <i>Microbacterium oxydans</i>                         |
|        | B2044                     | <i>Microbacterium sp.</i>                             |
|        | B2055                     | <i>Microbacterium sp.</i>                             |
|        | B2058                     | <i>Microbacterium sp.</i>                             |
|        | B2062                     | <i>Microbacterium aurum/pumilum/aoyamense</i>         |
|        | B2065                     | <i>Microbacterium arthrosperae</i>                    |
|        | B2078                     | <i>Microbacterium foliorum/oxydans/shrimpcida</i>     |
|        | B2118                     | <i>Microbacterium foliorum/oxydans</i>                |
|        | B2133                     | <i>Microbacterium sp.</i>                             |
|        | B2433                     | <i>Microbacterium maritypicum/oxydans/Erwinia sp.</i> |
|        | B2434                     | <i>Microbacterium sp.</i>                             |
|        | B2451                     | <i>Microbacterium oxydans/maritypicum</i>             |
|        | B2507                     | <i>Microbacterium oxydans/maritypicum</i>             |
|        | B2538                     | <i>Microbacterium esteraromaticum</i>                 |
|        | B2577                     | <i>Microbacterium phyllosphaerae</i>                  |
|        | B2644                     | <i>Microbacterium esteraromaticum</i>                 |
|        | B2649                     | <i>Microbacterium testaceum/foliorum/oxydans</i>      |
|        | B2652                     | <i>Microbacterium sp./chleiferi</i>                   |
|        | B2653                     | <i>Microbacterium sp.</i>                             |
|        | B2661                     | <i>Microbacterium hydrocarbonoxydans</i>              |
| B2718  | <i>Microbacterium sp.</i> |                                                       |
| B25    | B322                      | <i>Lysobacter enzymogenes</i>                         |
|        | B733                      | <i>Lysobacter capsici</i>                             |
|        | B759                      | <i>Lysobacter antibioticus</i>                        |
|        | B763                      | <i>Lysobacter antibioticus</i>                        |
|        | B1380                     | <i>Lysobacter capsici</i>                             |
|        | B2596*                    | <i>Lysobacter enzymogenes C3</i>                      |
| B410   | B971                      | <i>Bacillus idriensis</i>                             |
|        | B997                      | <i>Bacillus megaterium</i>                            |
|        | B1013                     | <i>Bacillus marisflavi</i>                            |
|        | B1080                     | <i>Bacillus sp./cereus</i>                            |

|       |       |                                                                 |
|-------|-------|-----------------------------------------------------------------|
|       | B1370 | <i>Bacillus licheniformis</i>                                   |
|       | B1495 | <i>Bacillus megaterium</i>                                      |
|       | B1563 | <i>Bacillus simplex</i>                                         |
|       | B1883 | <i>Bacillus simplex</i>                                         |
|       | B1912 | <i>Bacillus licheniformis</i>                                   |
|       | B2198 | <i>Bacillus subtilis</i>                                        |
|       | B2309 | <i>Bacillus litoralis/niabensis/simplex)</i>                    |
|       | B2361 | <i>Bacillus licheniformis/aerius</i>                            |
|       | B2399 | <i>Bacillus litoralis</i>                                       |
|       | B2424 | <i>Bacillus subtilis</i>                                        |
|       | B2525 | <i>Bacillus niabensis</i>                                       |
|       | B2541 | <i>Bacillus horikoshii</i>                                      |
|       | B2634 | <i>Bacillus cereus/thruingiensis/wiedmannii</i>                 |
| B2017 | 47    | <i>Pseudomonas psychrotolerans</i>                              |
|       | 86    | <i>Pseudomonas chlororaphis</i>                                 |
|       | 87    | <i>Pseudomonas putida</i>                                       |
|       | 194   | <i>Pseudomonas chlororaphis</i>                                 |
|       | 402   | <i>Pseudomonas putida</i>                                       |
|       | 678   | <i>Pseudomonas resinovorans</i>                                 |
|       | 767   | <i>Pseudomonas sp./pseudoalcaligenes</i>                        |
|       | 770   | <i>Pseudomonas resinovorans</i>                                 |
|       | 807   | <i>Pseudomonas plecoglossicida</i>                              |
|       | 898   | <i>Pseudomonas moraviensis</i>                                  |
|       | 951   | <i>Pseudomonas sp./putida/fluorescens</i>                       |
|       | 1146  | <i>Pseudomonas rhodesiae</i>                                    |
|       | 1198  | <i>Pseudomonas poae/trivialis</i>                               |
|       | 1269  | <i>Pseudomonas fluorescens/monteilii/sp./putida</i>             |
|       | 1295  | <i>Pseudomonas lini/mediterranea</i>                            |
|       | 1308  | <i>Pseudomonas frederiksbergensis</i>                           |
|       | 1404  | <i>Pseudomonas frederiksbergensis</i>                           |
|       | 1410  | <i>Pseudomonas putida</i>                                       |
|       | 1449  | <i>Pseudomonas putida</i>                                       |
|       | 1453  | <i>Pseudomonas putida/monteilii</i>                             |
|       | 1517  | <i>Pseudomonas fulva</i>                                        |
|       | 1927  | <i>Pseudomonas fluorescens/marginalis/veronii</i>               |
|       | 1968  | <i>Pseudomonas plecoglossicida/putida/monteilii/taiwanensis</i> |
|       | 2016  | <i>Pseudomonas fluorescens/koreensis</i>                        |
|       | 2018  | <i>Pseudomonas putida</i>                                       |
|       | 2019  | <i>Pseudomonas sp./putida</i>                                   |

|       |        |                                                                                |
|-------|--------|--------------------------------------------------------------------------------|
|       | 2073   | <i>Pseudomonas sp./fluorescens/putida</i>                                      |
|       | 2081   | <i>Pseudomonas koreensis/moraviensis/putida/clemancea</i>                      |
|       | 2104   | <i>Pseudomonas mandeli</i>                                                     |
|       | 2105   | <i>Pseudomonas putida/koreensis</i>                                            |
|       | 2106   | <i>Pseudomonas migulae</i>                                                     |
|       | 2107   | <i>Pseudomonas punonensis</i>                                                  |
|       | 2138   | <i>Pseudomonas orientalis</i>                                                  |
|       | 2178   | <i>Pseudomonas sp./clemancea/moraviensis</i>                                   |
|       | 2299   | <i>Pseudomonas plecoglossicida/monteilli/putida</i>                            |
|       | 2346   | <i>Pseudomonas putida/monteilii/taiwanensis/plecoglossicida</i>                |
|       | 2347   | <i>Pseudomonas sp./pseudoalcaligenes</i>                                       |
|       | 2409   | <i>Pseudomonas koreensis/moraviensis/putida/clemancea</i>                      |
|       | 2435   | <i>Pseudomonas pseudoalcaligenes</i>                                           |
|       | 2438** | <i>Pseudomonas putida</i> 90 (ATCC11607)                                       |
|       | 2452   | <i>Pseudomonas koreensis</i>                                                   |
|       | 2453   | <i>Pseudomonas koreensis</i>                                                   |
|       | 2463   | <i>Pseudomonas koreensis/moraviensis/putida/fluorescens</i>                    |
|       | 2473   | <i>Pseudomonas koreensis/moraviensis/putida</i>                                |
|       | 2475   | <i>Pseudomonas lurida/tolaasii</i>                                             |
|       | 2517   | <i>Pseudomonas putida/plecoglossicida</i>                                      |
|       | 2518   | <i>Pseudomonas putida/monteilii/taiwanensis/plecoglossicida/humanensis</i>     |
| B2021 | B393   | <i>Pseudomonas azotoformans/putida/gessardii</i>                               |
|       | B906   | <i>Pseudomonas libanensis/azotoformans/fluorescens/poae/gessardii/reactans</i> |
|       | B949   | <i>Pseudomonas grimontii</i>                                                   |
|       | B1133  | <i>Pseudomonas grimontii</i>                                                   |
|       | B1146  | <i>Pseudomonas rhodesiae</i>                                                   |
|       | B1176  | <i>Pseudomonas veronii/marginalis/fluorescens</i>                              |
|       | B1187  | <i>Pseudomonas veronii/fluorescens</i>                                         |
|       | B1198  | <i>Pseudomonas poae/trivialis</i>                                              |
|       | B1202  | <i>Pseudomonas extremaustralis/marginalis/fluorescens/veronii/fulva</i>        |
|       | B1286  | <i>Pseudomonas fluorescens</i>                                                 |
|       | B1927  | <i>Pseudomonas fluorescens/marginalis/veronii</i>                              |
|       | B2138  | <i>Pseudomonas orientalis</i>                                                  |
|       | B2447  | <i>Pseudomonas libanensis/azotoformans/fluorescens/poae/gessardii/reactans</i> |
|       | B2454  | <i>Pseudomonas libanensis/azotoformans/fluorescens/gessardii/poae</i>          |
|       | B2467  | <i>Pseudomonas libanensis/azotoformans/fluorescens/poae/gessardii</i>          |
|       | B2472  | <i>Pseudomonas fluorescens/poae/extremorientalis</i>                           |

|  |       |                                    |
|--|-------|------------------------------------|
|  | B2475 | <i>Pseudomonas lurida/tolaasii</i> |
|  | B2553 | <i>Pseudomonas fluorescens</i>     |

\* Kindly provided by Prof. Gary Yuen. \*\* Purchased from the Spanish Type Culture collection.

Supplemental Table 3. Physico-chemical parameters of waters.

|                | pH   | Conductivity<br>( $\mu\text{S}\cdot\text{cm}^{-1}$ ) | Turbidity<br>(OD <sub>420</sub> ) | Dry residue<br>( $\text{mg}\cdot\text{L}^{-1}$ ) |
|----------------|------|------------------------------------------------------|-----------------------------------|--------------------------------------------------|
| St. Cugat well | 8.04 | 2422                                                 | 0.003                             | 131.9                                            |
| Anoia river    | 7.93 | 2750                                                 | 0.014                             | 138                                              |
| Foix river     | 8.24 | 1326                                                 | 0.015                             | 68.6                                             |
| Tap            | 7.7  | 853                                                  | 0.008                             | 36                                               |

The dry residue was measured by drying 0.1 L at 80 °C for 24 h in a volumetric flask and weighting the full and dry flasks equilibrated to room temperature in an FV-120C scale (Gram). Further information about the water qualities can be obtained at

<http://www.ub.edu/barcelonarius/web/index.php> (Anoia and Foix rivers) and <https://www.aiguesdevilafranca.cat/es-es/El-agua-en->

Vilafranca/Control-calidad-del-agua (tap water) Further information of the St. Cugat well water is not available.

Supplemental Table 4. qPCR efficiency using intercalating dye and hydrolysis probes under increasing multiplexing degree.

| mBCA  | Primer<br>(label) | Intercalating dye | Hydrolysis probes |             |         |
|-------|-------------------|-------------------|-------------------|-------------|---------|
|       |                   |                   | Monocolor         | Dual color  | Triplex |
| B24   | 2 (FAM)           | 1.971             | 1.968             | 1.953/2.012 | 1.991   |
|       | 4 (R610)          | 2.230             | 1.896             | 1.978/2.041 | 1.875   |
|       | 5 (CY5)           | 2.142             | 1.920             | 1.884/1.848 | 1.982   |
| B25   | 24 (FAM)          | 1.868             | 1.987             | 2.029/1.909 | 2.040   |
|       | 27 (R610)         | 1.938             | 1.982             | 2.047/1.987 | 2.000   |
|       | 473 (CY5)         | 1.956             | 2.045             | 1.921/1.964 | 2.010   |
| B410  | 35 (FAM)          | 2.288             | 2.376             | 1.774/1.829 | 1.978   |
|       | 20 (R610)         | 2.109             | 1.945             | 1.895/1.848 | 1.834   |
|       | 167 (CY5)         | 2.176             | 1.828             | 1.820/1.839 | 1.835   |
| B2017 | 18 (FAM)          | 1.800             | 1.635             | 1.606/1.712 | 1.686   |
|       | 20 (R610)         | 1.630             | 2.005             | 1.996/2.009 | 1.994   |
|       | 17 (CY5)          | 1.889             | 1.919             | 1.959/1.912 | 1.924   |
| B2021 | 43 (FAM)          | 1.921             | 1.945             | 1.863/2.183 | 2.455   |
|       | 182 (R610)        | 2.083             | 1.95              | 2.070/2.035 | 2.16    |
|       | 2 (CY5)           | 2.637             | 2.213             | 2.117/2.126 | 2.060   |



Supplemental Table 5. Absolute limits of detection of 5 bacterial biocontrol strains using pure amplicon as PCR template.

| Strain | Limit of detection<br>(cells $\mu\text{L}^{-1}$ template) | Linearity<br>(orders of magnitude) |
|--------|-----------------------------------------------------------|------------------------------------|
| B24    | 35                                                        | 7                                  |
| B25    | 1                                                         | 7                                  |
| B410   | 122                                                       | 7                                  |
| B2017  | 114                                                       | 5                                  |
| B2021  | 12.5                                                      | 5                                  |
